# Supplementary material for: Enrichment and separation of steroidal saponins from the fibrous roots of Ophiopogon japonicus using macroporous adsorption resins
Source: Royal Society of Chemistry journal article supplement (doi:10.1039/c8ra09319a), 2019-01-01
Supplement: c8ra09319a1.pdf [file c8ra09319a1.pdf]

**Fig.1S HPLC chromatograms of three steroidal saponins for FROJ  
(A)S1; (B)S2; (C)S3.**

**(A)S1**

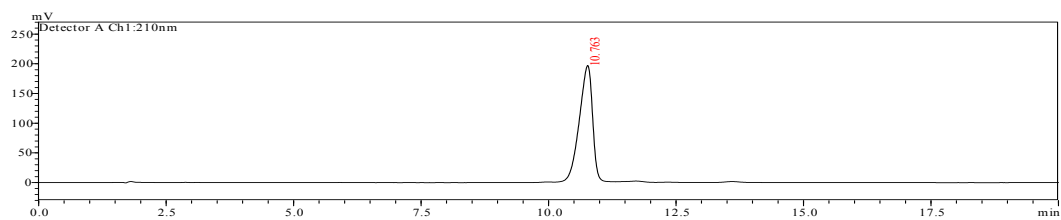

**(B)S2**

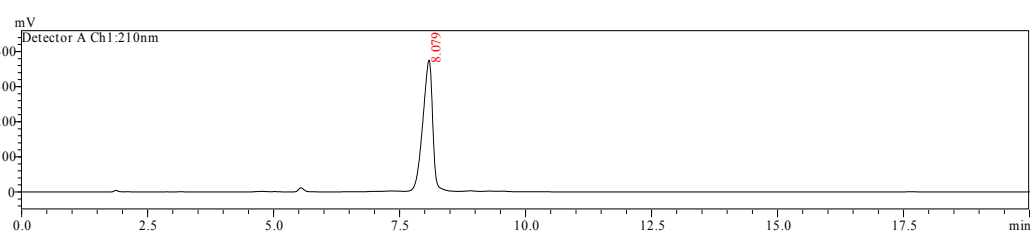

**(C)S3**

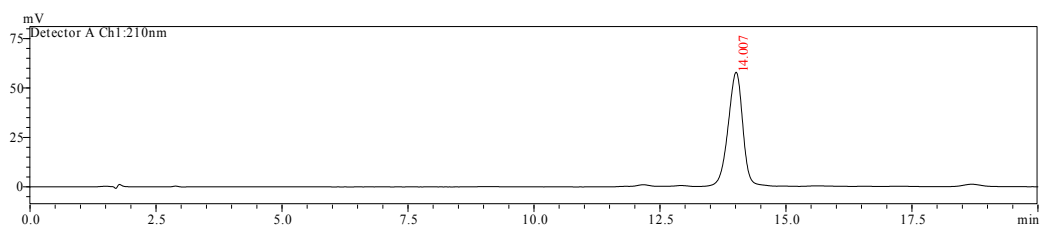

**Fig.1S HPLC-MS chromatograms of three steroidal saponins for FROJ: (A)S1; (B)S2; (C)S3.**

**(A)**

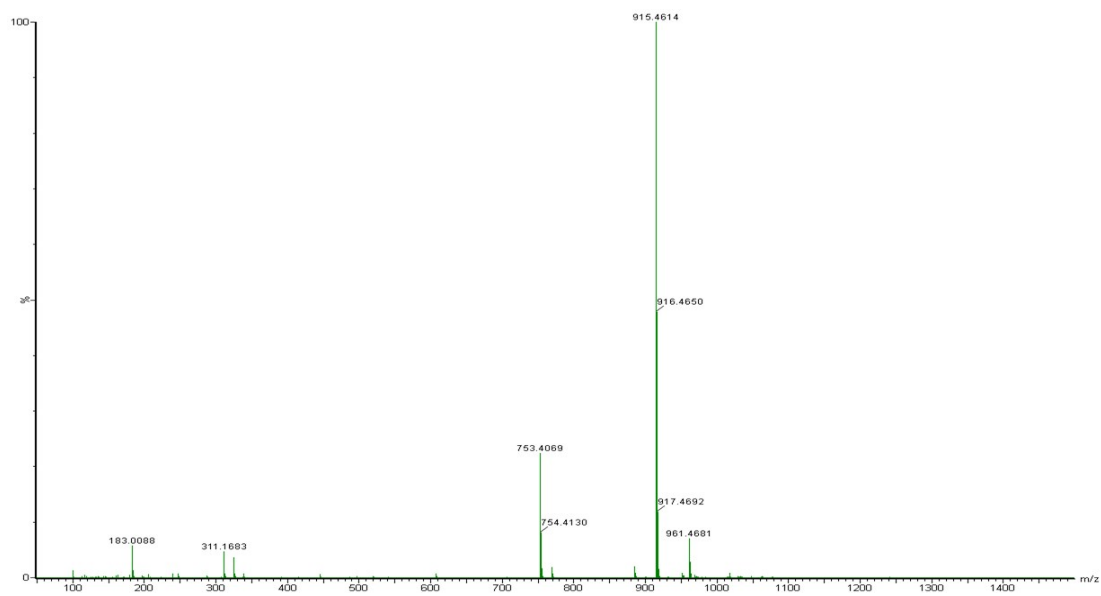

**(B)**

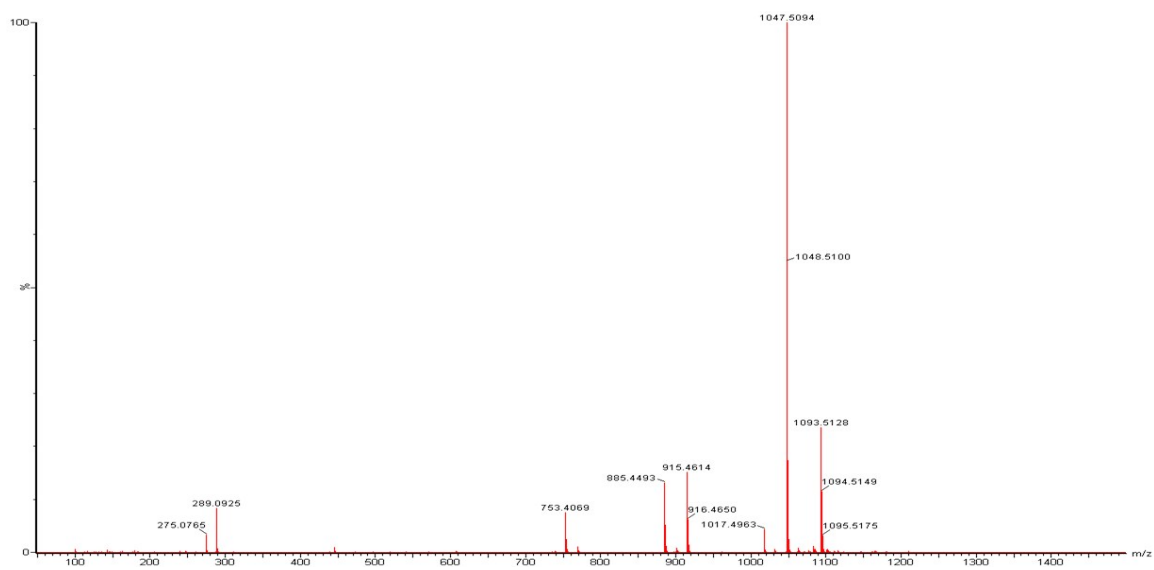

(C)

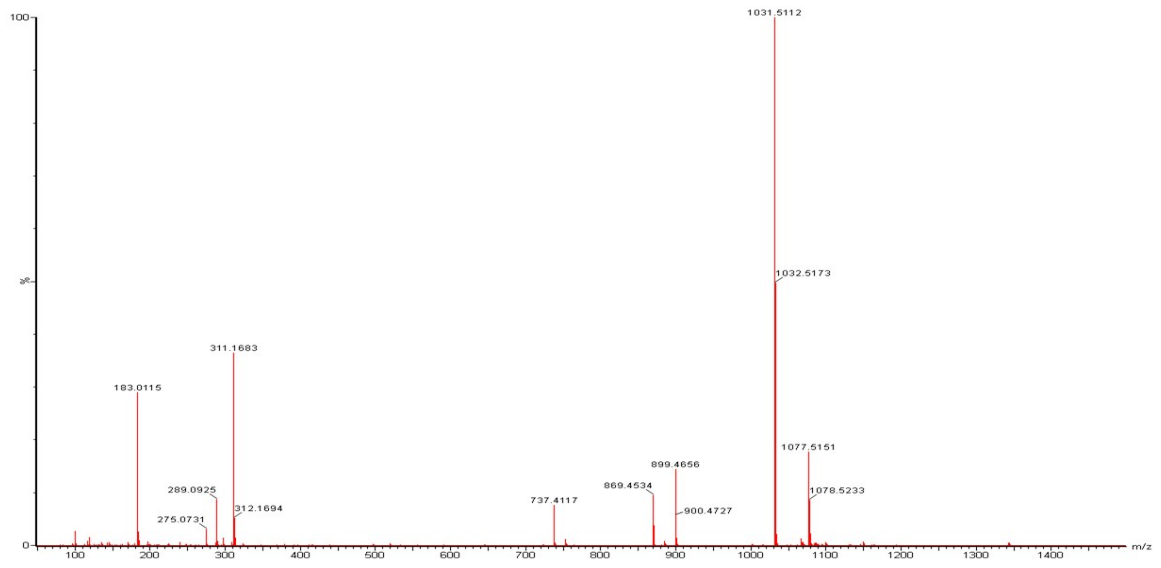

Table 1S. <sup>13</sup>C NMR data for steroidal saponins 1–3 (500 MHz, δ in ppm, pyridine-d<sub>5</sub>)

| Position | S1    | S2    | S3    | Position      | S1    | S2    | S3    |
|----------|-------|-------|-------|---------------|-------|-------|-------|
| 1        | 38.2  | 37.7  | 37.5  | 1'-Glc-1      | 100.4 | 99.8  | 99.9  |
| 2        | 30.6  | 30.4  | 30.0  | 2'            | 77.5  | 76.0  | 76.1  |
| 3        | 78.4  | 78.4  | 78.4  | 3'            | 90.0  | 80.3  | 80.2  |
| 4        | 39.2  | 38.7  | 38.6  | 4'            | 79.0  | 80.3  | 80.2  |
| 5        | 140.7 | 140.2 | 140.7 | 5'            | 78.1  | 77.8  | 77.7  |
| 6        | 122.9 | 122.4 | 121.9 | 6'            | 62.9  | 62.4  | 62.0  |
| 7        | 26.7  | 26.1  | 31.8  | 2'-Rha-1''    | 102.7 | 102.2 | 102.1 |
| 8        | 36.8  | 36.2  | 30.4  | 2''           | 73.0  | 72.5  | 72.5  |
| 9        | 44.0  | 43.5  | 50.2  | 3''           | 73.3  | 72.8  | 72.7  |
| 10       | 37.9  | 37.4  | 37.1  | 4''           | 74.6  | 73.9  | 73.9  |
| 11       | 20.6  | 20.1  | 20.9  | 5''           | 70.1  | 70.0  | 69.9  |
| 12       | 27.1  | 26.6  | 32.3  | 6''           | 19.2  | 18.6  | 18.6  |
| 13       | 48.8  | 48.3  | 44.7  | 3'-Xy3-1'''   |       | 102.4 | 102.4 |
| 14       | 88.3  | 88.7  | 53.0  | 2'''          |       | 73.9  | 73.9  |
| 15       | 40.9  | 40.4  | 32.4  | 3'''          |       | 78.2  | 78.2  |
| 16       | 91.0  | 90.5  | 89.9  | 4'''          |       | 70.7  | 70.6  |
| 17       | 91.6  | 91.0  | 90.1  | 5'''          |       | 65.9  | 65.9  |
| 18       | 21.1  | 21.0  | 17.5  | 3'-Glc-1''''  | 105.0 |       |       |
| 19       | 19.9  | 19.4  | 19.4  | 2''''         | 75.5  |       |       |
| 20       | 45.6  | 45.1  | 45.1  | 3''''         | 79.2  |       |       |
| 21       | 10.4  | 9.8   | 9.8   | 4''''         | 72.0  |       |       |
| 22       | 110.1 | 109.6 | 109.8 | 5''''         | 70.1  |       |       |
| 23       | 32.7  | 32.1  | 32.1  | 6''''         | 62.9  |       |       |
| 24       | 29.4  | 28.9  | 28.8  | 4'-Glc-1''''' |       | 102.4 | 102.4 |
| 25       | 30.9  | 30.0  | 30.4  | 2'''''        |       | 74.0  | 74.0  |
| 26       | 67.3  | 66.8  | 66.7  | 3'''''        |       | 75.3  | 75.2  |
| 27       | 17.8  | 17.3  | 17.3  | 4'''''        |       | 70.6  | 70.6  |
|          |       |       |       | 5'''''        |       | 77.7  | 77.7  |
|          |       |       |       | 6'''''        |       | 61.7  | 61.3  |
